Genetic analysis of Eclosion Hormone action during *Drosophila* larval ecdysis

Eileen Krüger<sup>1</sup>, Wilson Mena<sup>1</sup>, Eleanor C. Lahr<sup>2,3</sup>, Erik C. Johnson<sup>4</sup>, and John Ewer<sup>1,2,5</sup>

1- Centro Interdisciplinario de Neurociencia de Valparaíso, Universidad de Valparaíso, Chile

2- Entomology Department, Cornell University, 5130 Comstock, Ithaca, NY 14850, USA

3- Department of Atmospheric Sciences at Texas A&M University, College Station, TX 77840, USA.

4- Department of Biology, Wake Forest University, Winston-Salem, NC 27109, USA.

5- Corresponding author

Centro Interdisciplinario de Neurociencias de Valparaíso, Facultad de Ciencias, Universidad de Valparaíso, Valparaíso, Chile

Tel: 56-32-250-8143

FAX: 56-32-250-8040

e-mail: john.ewer@uv.cl

Key words: neuropeptide, molting, behavior, postembryonic development, insect.

## ACKNOWLEDGMENTS

We thank Roslyn Noar for screening putative *eh* deletions and Julie Simpson for UAS-GCaMP3.2. We are very grateful to Benjamin White for comments and suggestions on the manuscript. E.C.J is funded by NSF IOS1355097; J.E. is funded by FONDECYT (1141278) and the Centro Interdisciplinario de Neurociencia de Valparaíso (CINV) Millennium Institute grant P09-022-F, supported by the Millennium Scientific Initiative of the Ministerio de Economía, Fomento y Turismo.

## **AUTHOR CONTRIBUTIONS**

EK, WM and JE planned the experiments; EK carried out most experiments; WM carried out the calcium imaging; EL and EJ provided reagents. EK and JE analyzed the results; JE wrote the manuscript. All authors read and commented on the manuscript and approved the final version.

## SUMMARY

Insect growth is punctuated by molts, during which the animal produces a new exoskeleton. The molt culminates with ecdysis, an ordered sequence of behaviors that causes the old cuticle to be shed. This sequence is activated by Ecdysis Triggering Hormone (ETH), which acts on the CNS to activate neurons that produce neuropeptides implicated in ecdysis, including Eclosion hormone (EH), Crustacean Cardioactive Peptide (CCAP), and bursicon. Despite over 40 years of research on ecdysis, our understanding of the precise roles of these neurohormones remains rudimentary. Of particular interest is EH, whose role beyond the well-accepted action of massively upregulating ETH release has remained elusive. We report on the isolation of an *eh* null mutant in *Drosophila*, and use it to investigate the role of EH in larval ecdysis. We found that null mutant animals invariably died at around the time of ecdysis, revealing an essential role in its control. Unexpectedly, however, they failed to express the preparatory behavior of pre-ecdysis while directly expressing the motor program of ecdysis. In addition, although ETH release could not be detected in these animals, the lack of pre-ecdysis could not be rescued by injections of ETH, suggesting that EH is required within the CNS for ETH to trigger the normal ecdysial sequence. Using a genetically-encoded calcium probe we show that EH configures the response of the CNS to ETH. These findings show that EH plays an essential role in the *Drosophila* CNS in the control of ecdysis, in addition to its known role in the periphery of triggering ETH release.

## INTRODUCTION

In insects, continuous growth and development requires the exoskeleton to be replaced, which occurs during the molt and culminates with the process of ecdysis. During ecdysis, a precisely timed and concatenated series of behaviors causes the remains of the old exoskeleton to be shed, and the new one to be inflated, hardened, and pigmented. Research conducted during the last 40 years has revealed that a suite of neuropeptides controls the precise sequence of behaviors and physiological events that allow the insect to transition from one stage to the next (Reviews: Ewer and Reynolds, 2002; Zitnan and Adams, 2012). These neuropeptides include Ecdysis Triggering Hormone (ETH), which is produced by peripheral endocrine cells, and the centrally produced neuropeptides, Eclosion hormone (EH), Crustacean Cardioactive Peptide (CCAP), and bursicon. Evidence from both Lepidoptera (e.g., Zitnan et al., 1996) and *Drosophila* (e.g., Park et al., 2002) indicates that ETH can turn on the entire ecdysial sequence. Direct targets of ETH include neurons that express FMRFamide, EH, and CCAP (some of which also express bursicon and/or the MIP peptide) (Kim et al., 2006a, 2006b), and their timing of activation following ETH release as well as functional analyses (Lahr et al., 2012; Honegger et al., 2008; Kim et al., 2006a; Gammie and Truman, 1997a), suggests a role in the control of different phases of ecdysis. Thus, FMRFamide is proposed to regulate the early phase of the behavior, EH and the CCAP neurons that express CCAP or CCAP and MIP would regulate ecdysis proper, whereas neurons that co-express CCAP, MIP, and bursicon participate in the postecdysial phases of the behavior.

EH has been implicated in the control of ecdysis since its discovery in Lepidoptera over 40 years ago (Truman and Riddiford, 1970). In *Manduca* (Truman et al., 1980; Copenhaver and Truman, 1982) and *Bombyx* (Fugo and Iwata, 1983), injections of EH into the hemolymph cause premature ecdysis, and addition of EH to an isolated *Manduca* CNS can induce the ecdysis

motor program (Gammie and Truman, 1999; Zitnan and Adams, 2000), indicating that EH is sufficient for turning on ecdysis. In *Tribolium* injection of EH RNAi causes a severe weakening of pre-ecdysis and a complete suppression of ecdysis (Arakane et al., 2008), suggesting that EH is also necessary for ecdysis. Nevertheless, the precise role of EH in *Drosophila* remains elusive. Indeed, flies bearing targeted ablations of EH neurons express relatively minor defects at larval ecdysis (McNabb et al., 1997; Clark et al., 2004) with about a third of animals reaching adulthood (McNabb et al., 1997). In addition, and most perplexingly, flies lacking EH neurons are insensitive to injections of ETH: in contrast to wild-type animals for which such injections advance the onset of ecdysis, ETH injections do not change the timing of ecdysis of either larvae or adults bearing targeted ablations of EH neurons (McNabb et al., 1997; Clark et al., 2004).

From these observations it is difficult to propose a unified model for the role of EH in the control of ecdysis beyond its well-accepted role in potentiating ETH release (Ewer et al., 1997; Kingan et al., 1997). Furthermore, the majority of the information from *Drosophila* stems from experiments in which the EH neurons were genetically ablated (McNabb et al., 1997; Baker et al., 1999; Clark et al., 2004). Although this approach has provided valuable insights into the possible role of this neuropeptide at ecdysis, the interpretation of the findings is complicated by the fact that such animals lack the EH neurons in addition to the EH peptide, making it impossible to distinguish between functions subserved by the peptide itself from those effected by the EH neurons and other neuropeptides they may express.

We report here on the isolation of a null allele of the *eh* gene, and the characterization of the larval ecdysis phenotype of animals devoid of EH function. The lack of *eh* function is completely lethal, with most animals dying during the larval stages, at around the time of ecdysis. We show that these defects are not caused by the accompanying lack of ETH release and report that the

response of direct targets of ETH is severely altered in the absence of EH. Thus, our findings reveal that EH plays a key role within the CNS and is required for ETH to cause the expression of normal ecdysis behaviors.

## MATERIALS AND METHODS

### Fly strains and genetics

#### *Fly strains*

Fly stocks were maintained at room temperature (22-25°C) on standard agar/cornmeal/yeast media. Unless noted they were obtained from the Bloomington *Drosophila* Stock Center (BL; Bloomington, Indiana, USA; <http://flystocks.bio.indiana.edu/>). Stocks used included *P*-element insertion G8594 (GenExel, now Arogen), *PiggyBac* insertions *f01683* and *d00811* (Exelixis Harvard stock Center), EH-GAL4 (McNabb et al., 1997), CCAP-GAL4 (Park et al., 2003), ETH-GAL4 (Diao et al., 2015), and calcium sensor, UAS-GCaMP3.2, (kindly provided by Julie Simpson, HHMI; Janelia Research Campus, USA). Stocks bearing homozygous lethal mutations were maintained heterozygous with GFP-expressing balancer chromosomes (BL#4533 and BL#4534).

#### *Isolation of null allele of eh gene*

A null allele of the *eh* gene (*eh<sup>exc</sup>*) was isolated by imprecise excision of *P*-element insertion G8594, located 1.1Kb 3' of the *eh* gene (cf. Fig. 1A, below) using a standard scheme involving the “ $\Delta$ 2-3” transposase (Robertson et al., 1988). Balanced lines were produced using single white-eyed excision males and homozygous third instar larvae were screened by PCR using primer pair EH-F1 + EH-R1 (see Table 1). Lines that did not produce a PCR product of the expected size were rescreened for EH immunoreactivity and the *eh* gene from immunonegative lines was sequenced.

#### *Creation of genetic deletion that includes eh gene*

Exelixis strains *f01683* and *d00811* were used to create a 32 Kb genetic deletion that included the *eh* gene (*Df(3)eh*) (cf. Fig. 1A, below), using the FLP-FRT system as described in Parks et al.

(2004). Putative deletion bearing males were used singly to set up balanced lines; homozygous larvae were then screened by PCR using primer pair EH-F2 + EH-R2 (see Table 1), and the limits of resulting deletions verified by PCR. In addition to the *eh* gene, this deletion also completely removes gene CG14330 (which encodes a gene of unknown function) and partially removes CG5873, a heme peroxidase encoding gene, which when mutant causes no apparent defects (Flybase).

## **Molecular Biology**

### *PCR*

DNA was obtained from single third instar larva as described in Gloor et al. (1993), but using 10 $\mu$ l of “squish buffer” (0.4  $\mu$ g/ $\mu$ L proteinase K, 10 mM Tris pH 8, 0.2 mM EDTA, and 25 mM NaCl) per fly larva. One  $\mu$ l of extract was used for each 20 $\mu$ L PCR reaction, which was run using the following conditions: 94°C (3 min); then (30) cycles of 94°C (45 s), 55°C (0.5 min), 72°C (1.0 min/Kb of product); followed by (1) cycle at 72°C for 10 min.

### *Transgenic constructs*

UAS-*eh* construct: *eh* cDNA was amplified by RT-PCR from RNA extracted from third instar CNSs following manufacturer’s instructions. Primers pair EH-F3 + EH-R3 (Table 1) was used to amplify a 400 bp fragment that includes the entire *eh* coding region; 3’ reverse primer included a *NotI* site for subcloning purposes. PCR products obtained from (3) independent cDNA’s were cloned into pGEM-T Easy vector (Promega Corporation, Madison, WI, USA), and sequenced for verification. The fragment containing the *eh* cDNA was then cloned into pUAST *P*-element vector (van Roessel and Brand, 2000) and sent to BestGene, Inc. (Chino Hills, CA, USA) for germline transformation.



Genomic *eh* rescue construct: a 4.8 Kb fragment of genomic DNA containing the entire *eh* gene and including 1.9Kb of 5' regulatory sequences, which is sufficient to faithfully drive gene expression in EH neurons (McNabb et al., 1997), was amplified by PCR from a BAC clone from the RPCI-98 *Drosophila melanogaster* BAC Library (<http://bacpac.chori.org/dromel98.htm>) using the High Fidelity Expand Long Template PCR system (Roche Diagnostics Corporation, Indianapolis, IN, USA) following manufacturer's instructions using primer pair EH-F4 + EH-R4 (Table 1). The PCR product was cloned into pGEM-T Easy vector (Promega Corporation, Madison, WI, USA), subcloned into the *pattB* vector (Venken et al., 2006) by Genewiz, Inc. (South Plainfield, New Jersey, USA), and sent to BestGene, Inc. (Chino Hills, CA, USA) for germline transformation.

## Synthesis of EH

### *Construction of pMAL-EH*

Synthetic EH was produced by *in vitro* expression using the pMAL protein fusion and purification system (pMAL-c2x; New England Biolabs, Ipswich, MA, USA). For this, a 222 bp fragment that encodes the predicted mature EH protein (minus putative leader sequence) was amplified from the EH cDNA (see above) using primer pair EH-F5 + EH-R5 (Table 1); forward primer included an *EcoRI* site for subcloning purposes. The PCR product was subcloned into pGEM-T Easy vector (Promega Corporation, Madison, WI, USA), sequenced for verification, and subcloned in frame into the *EcoRI* site of the pMAL-c2x vector.

### *EH synthesis*

Maltose-binding protein-EH (MBP-EH) fusion protein and MBP alone (control) were expressed following manufacturers recommendations in Origami cells (Novagen, Merck, Darmstadt,

Germany) to facilitate disulfide bond formation, which is thought to be a critical component of bioactive EH (Nagasawa et al., 1983; Terzi et al., 1988).

### **Hormone injections**

Synthetic ETH was obtained from Bachem (Bachem Americas, Torrance, CA, USA). It was diluted in distilled water and used at a final concentration of 1mM. EH-MBP and MBP (see above) were diluted in distilled water. Fifty-100 nl were injected into pharate 2<sup>nd</sup> instar larvae using a PV800 pneumatic picospritzer (World Precision Instruments, Sarasota, FL). For ETH this dose (corresponding to ca. 50-100 fmoles) is known to cause suprathreshold responses in pharate larvae (Park et al, 2002; Clark et al., 2004). Control injections consisted of the same volume of distilled water (for ETH) and similar concentration of MBP alone (for EH).

### **Immunostaining**

Immunostaining was carried out as described in Clark et al. (2004) using the following antisera: rabbit anti-CCAP, generously provided by Hans Agricola, and used at 1:5000; rabbit anti-EH generously provided by James Truman and used at 1:200; rabbit anti-ETH generously provided by Michael Adams and used at 1:2000.

### **Quantitation of immunolabeling.**

CCAP- and ETH-immunoreactivity were quantitated as described in Clark et al., (2004) assigning a subjective score of 0 (no staining) to 3 (strongest staining). The person scoring the preparations did not know the genotype or time at which the tissues had been fixed.

## Behavioral analyses

Larvae we collected and their ecdysial behaviors recorded as described in Clark et al. (2004). All analyses involving *eh* mutants were done using hemizygous *eh<sup>exc</sup>/Df(3)eh<sup>-</sup>* larvae; genetic rescue animals were similarly tested in this genetic background.

## Imaging of Ca<sup>2+</sup> dynamics

Imaging of *ex vivo* Ca<sup>2+</sup> dynamics was carried out as described in Kim et al. (2006a), using CNSs from second instar larvae at the DVP (“double vertical plate”) stage, approx. 30 minutes prior to ecdysis (Park et al., 2002). Preparations were imaged under an Olympus DSU Spinning Disc microscope using a 40X (NA 0.80) water immersion lens. They were first imaged every 5 s for 5 min, and preparations showing spontaneous activity (ca. 5 % of the preparations) were discarded. They were then stimulated with 1 mM synthetic ETH1 (Bachem Americas, Torrance, CA, USA) and GFP fluorescence captured every 5 s for 90 min. Resulting recordings were analyzed using Cell<sup>^</sup>R Olympus Imaging Software (Version 2.6).

## Statistical analyses

Statistical significance was evaluated using the Prism v. 6.0 (GraphPad Software, La Jolla, California, USA). Quantitative results were compared by ANOVA followed by Tukey's HSD *post-hoc* analyses. Categorical data based on qualitative measurements were compared by Kruskal–Wallis one-way analysis of variance.

## RESULTS

### Generation of *eh* null allele

We created a null *eh* allele by excising a *P*-element inserted within the *eh* gene, downstream of the EH neuropeptide-encoding sequences (Fig. 1A). Potential excision flies were identified by

PCR then screened for progeny that lacked EH-immunoreactivity (-IR). Larvae from a single excision line (out of ca. 500 single male white-eyed excision lines) lacked a diagnostic PCR product, and were then found to lack EH-IR (Fig 1B). Subsequent sequence analyses revealed that this mutant carried a 2.6 Kb deletion of *eh* DNA, which included 1.2Kb downstream of the *eh* transcription start, and including all EH neuropeptide-encoding sequences; it also retained a 1.7Kb fragment of the original *P*-element (cf. Fig. 1A). In addition to the *eh* gene, this excision also deletes part of the 3' end of a heme peroxidase gene, CG5873, which when mutant causes no apparent defects (Flybase).

### **Behavioral defects of *eh* null mutants.**

Flies hemizygous for the *eh* null excision allele ( $eh^{exc}/Df(3)eh^{-}$ ) did not survive to adulthood; most (>90%) lethality occurred during larval stages and invariably occurred at around the time of ecdysis, with around 80% lethality occurring at each larval transition: dead larvae either presented well-pigmented “double vertical plates” and had therefore failed to correctly ecdyse, or had shed the old cuticle but had failed to then inflate the trachea of the next stage. The few flies that reached the pupal stage showed the hallmarks of animals that had failed to properly ecdyse (Park et al., 2003; Lahr et al., 2012), such as small or absent head and shorter than normal legs and wings.

#### *Larval ecdysis behavior*

Ecdysis behaviors of hemizygous *eh* mutants were examined in most detail at the ecdysis to the 3<sup>rd</sup> instar. At this ecdysis, larvae switch from locomotion to ecdysial behaviors around 20 min after the appearance of DVP (“double vertical plate”, approx. 30 minutes prior to ecdysis; Park et al., 2002). Ecdysis normally consists of two distinct and concatenated behavioral routines, pre-ecdysis, followed by ecdysis (Fig. 2Aa). Although ecdysial behaviors of hemizygous *eh* mutant

larvae started at the normal time after DVP (start time of hemizygous *eh* mutant larvae vs. control,  $p > 0.05$ ), the pre-ecdysis phase was never observed; instead larvae transitioned directly into expressing ecdysis behaviors (Fig. 2Ab). However, this phase was extremely protracted, generally lasting more than the 90 min observation period. Of 11 animals that were monitored, only 5 had successfully shed their 2<sup>nd</sup> instar cuticle when a final inspection was done at 3h. Of the remaining 6, one died within the first hour after the start of the behavior, whereas the other 5 continued expressing ecdysis behavior at 3h and eventually died. Furthermore, the temporal organization of the behavior was dramatically disrupted. Unlike the normal behavior, which consists of 3-4 peristaltic waves in the anterior direction followed by 2-3 in the posterior direction (Fig. 1Da), these larvae expressed long runs of anterior- or posterior-directed peristalses, with no clear temporal order and interspersed with quiescent periods of variable duration (Fig. 1Db); nevertheless, this ecdysis-like behavior was made up of individual contractions that appeared normal in strength and organization. These defects were all rescued by supplying hemizygous animals with a transgene containing a wildtype copy of the *eh* gene (examples: Fig. 1Dc; Summary: Fig. 2Ac) indicating that the behavioral defects were specifically due to the absence of EH; in particular, they were not due to the accompanying lesion in gene CG5873.

### ***eh* mutants fail to release ETH and CCAP**

To further investigate the bases of the behavioral and physiological defects expressed by *eh* hemizygotes, we determined the status of ETH and CCAP secretion at ecdysis. In wildtype larvae, ETH secretion is initiated shortly before the onset of pre-ecdysis (Park et al., 2002; Clark et al., 2004), and is complete by the end of ecdysis (Fig. 3C; compare with Fig. 3A; data summarized in Fig. 3G, “Control: “pre” vs. “post”), when the remains of the cuticle as well as

the old lining of the trachea have been shed (Fig. 3D, compare with Fig. 3B). In *eh*<sup>-</sup> hemizygotes, by contrast, we observed no detectable release of ETH after execution of the ecdysis motor program (Fig. 3G, “*eh*<sup>-</sup>, post”). In a similar manner, the neuropeptide CCAP is released at the ecdysis of normal larvae (Park et al., 2003; Clark et al., 2004; Fig. 3F, compare with Fig. 3E; data summarized in Fig. 3H, compare “Control”: “pre” vs. “post”) yet no release was detectable in *eh*<sup>-</sup> hemizygotes at the end of ecdysis (Fig. 3H, “*eh*<sup>-</sup>, post”). Both ETH and CCAP secretion at ecdysis were restored in transgenic rescue animals (Fig. 3G and 3H, “Rescue, post”, for ETH and CCAP, respectively), indicating that these defects were caused by the lack of EH.

### **Defects of *eh* mutants are not rescued by injection of ETH**

The explosive release of ETH that occurs at ecdysis is fueled by a reciprocal endocrine relationship between ETH and EH in which EH triggers ETH release and vice versa (Ewer et al., 1997; Kingan et al., 1997; Clark et al., 2004). Thus, it is possible that the primary reason for the behavioral (Figs. 1Db and 2Ab) and endocrine (Fig. 3 G, H) defects expressed by *eh* mutants is due to the lack of ETH release (Fig. 3G). To address this possibility we examined the effects of injecting synthetic ETH into DVP+10’ *eh*<sup>-</sup> hemizygous larvae. In wildtype larvae, such injections accelerate the onset of the whole ecdysial sequence compared to vehicle-injected control (Fig. 2Bb vs. 2Ba;  $p < 0.05$ ). As shown in Fig. 2Bd such injections did significantly accelerate the onset of ecdysial behaviors of *eh*<sup>-</sup> hemizygous larvae ( $p < 0.01$ ), but, as occurred in the vehicle-injected (Fig. 2Bc) and in intact mutant animals (Fig. 2Ab), these behaviors consisted exclusively of ecdysis behaviors, and were never preceded by pre-ecdysis. These injections also failed to cause detectable secretion of ETH (Fig. 3G, “*eh*<sup>-</sup>, +ETH, post”) or CCAP (Fig. 3H, “*eh*<sup>-</sup>, +ETH, post”). Thus, the defects expressed by *eh*<sup>-</sup> mutants are not solely caused by the failure to release ETH. Furthermore, they show that EH is required for ETH to turn on the pre-ecdysis motor program,

not simply to facilitate ETH release. Nevertheless, they do reveal that ETH can trigger the premature onset of the ecdysis motor pattern even in the absence of EH, although the resulting behavior is protracted and generally ineffective in causing the shedding of the old cuticle.

### **Defects of *eh* mutants are partially rescued by injection of EH**

We next explored the effectiveness of EH injected into the hemolymph in rescuing the defects expressed by *eh* null mutants. The synthetic EH we used consisted of a fusion protein with maltose binding protein (MBP). We were unable to cleave intact EH away from MBP, and thus used the entire fusion protein for our assays; injections of MBP alone were used as control. The fusion protein used was at a concentration of about 20 $\mu$ g/ $\mu$ l, but it is unlikely that EH (approximately 8KDa) is as effective as the native hormone when complexed to MBP (approximately 42KDa). Thus, rather than relying on the concentration of protein to estimate the dose of EH injected, we “calibrated” its concentration based on its effectiveness in triggering ecdysis using wildtype larvae. As shown in Figure 4B-E, injections of increasing amounts of EH-MBP tended to shorten slightly the latency to ecdysis, although this effect was not statistically significant; injections of doses greater than 1x were usually lethal.

Strikingly, and in contrast to what we obtained following ETH injections (Fig. 2Bd), injections of EH-MBP did restore the expression of the preparatory behavior of pre-ecdysis, which was then followed by ecdysis behavior (Fig. 4H). Nevertheless, the duration of pre-ecdysis and ecdysis was longer than that expressed by wildtype larvae injected with the same “1:10” dose (Fig. 4D). In addition, the success of these injections was low, with only 4 out of 10 animals responding; the remaining 6 animals responded like MBP-injected controls, and expressed the characteristic protracted ecdysis-like behavior, which continued >70 min after injection (not shown).

### **Effectiveness of EH when ectopically expressed**

As an alternative to injecting EH we explored the effectiveness of misexpressing EH in the ETH-producing “Inka” cells in a *eh* hemizygous mutant background. As shown in Figure 5D, both the pre-ecdysis and the ecdysis phases of the behavior were rescued in 100% of such animals (N=13).

In order to further explore the effectiveness of EH in rescuing the ecdysis defects caused by the lack of EH, we determined the ability of EH to rescue *eh*- hemizygotes when misexpressed in different classes of neurons and cells. In particular, we examined the consequences of expressing EH in CCAP neurons in an *eh* mutant background. Although rescue was not complete, 7 animals out of 10 animals expressed a normal behavioral sequence (Fig. 5E); the remaining 3 animals expressed a behavior typical of the *eh* mutant (cf. Fig. 5B). CCAP has been placed downstream of EH in the hierarchy of peptides that controls ecdysis. Yet, contrary to our expectations, rescued animals initiated pre-ecdysis much sooner than normal. In some cases ecdysis occurred even prior to the appearance of pigmentation in the mouthplates of the next instar, producing third instars with completely unpigmented mouthparts. This phenotype is unexpected and implies that ecdysis was initiated at least 30 min earlier than normal, and that CCAP neurons (or some subpopulation of them) may be active prior to the normal release of EH and ETH; as far as we are aware this phenotype has only been previously reported for larvae lacking EH and CCAP neurons (Clark et al., 2004).

### **Response of CCAP network to ETH in the absence of EH**

In order to investigate the role of EH in determining the response of the CNS to ETH we examined the activation of CCAP neurons in CNSs challenged *ex vivo* with ETH. Neuronal activation was monitored using the calcium indicator GCaMP, which was genetically targeted to



CCAP neurons. During pupal ecdysis, 600nM ETH causes the activation of CCAP neurons approximately 20 min after addition of ETH to an isolated CNS, with the exact timing of onset and duration of the response depending on the serial homolog considered (Kim et al., 2006a). In the case of larval ecdysis, we found that activation following addition of 600nM ETH was first detected approximately 45 minutes after ETH challenge; this latency was reduced to around 30 min when a higher dose of 1 $\mu$ M was used, but could not be significantly reduced further by increasing the dose of ETH (not shown). The *ex vivo* response to an ETH challenge started at around 30 min with spikes in CCAP neurons from thoracic ganglion 3 (TN3), and which lasted approximately 28 minutes (Fig. 6A)( $28.6 \pm 0.9$ , N=7). Shortly afterwards ( $34.6 \pm 5.2$ , N=7) CCAP neurons in abdominal ganglia 1-4 (AN1-4) responded (Fig. 6B), showing a large response followed by a series of spikes of decreasing duration and amplitude. The inset in Fig. 6B shows that the coordination of the response between serial homologs was relatively low. These spikes likely correspond to large overshooting calcium action potentials, as have been recorded at ecdysis from homologous neurons in *M. sexta* (Gammie and Truman, 1997b).

The response to ETH of *eh* hemizygous animals differed significantly from the wildtype response in several respects (Fig 6C, D, and Fig. 7). First, the number of neurons that responded was greatly reduced: thus, whereas in wildtype animals 100% of neurons imaged in ganglia T3 (11 cells) and AN1-4 (52 cells) responded (cf. Fig. 7; N= 7 preparations), only half of T3 neurons (55%; 10 out of 18) and 16% AN1-4 neurons (10 out of 62) did so in *eh* hemizygous animals (cf. Fig. 7; N= 7 preparations). In addition, the amplitude recorded in neurons that responded was significantly attenuated (Fig. 6 C, D). This defect was most severe for segments AN1-4, where the average amplitude of the few neurons that responded was only 12% of that recorded in controls (Fig. 7, AN1-4, *eh*).

The defects observed in the response of CCAP neurons of hemizygous mutant larvae were substantially rescued by a single copy of the *eh* gene in terms of both the number and the amplitude of responding cells (Fig. 6 E, F, and Fig. 7, Rescue). For example in the case of AN1-4 neurons 60% (41 out of 68 neurons) of neurons responded (vs. 12% in *eh* hemizygous animals), and the amplitude of the average response was similar to that of controls (Fig. 7, Rescue). We assume that the partial rescue was due to the presence of a single copy of the *eh* transgene, which was, nevertheless, sufficient to rescue the behavioral defects to wildtype levels (Fig. 2, Ac).

## DISCUSSION

A number of neuropeptides have been implicated in the control of insect ecdysis. In *Drosophila* genetic approaches have been used to characterize the role of ETH (Park et al., 2002), CCAP (Park et al., 2003), and bursicon (Lahr et al., 2012). Despite the ability of EH to trigger ecdysis in a number of insects, flies bearing targeted ablations of EH neurons express only minor defects at ecdysis (McNabb et al., 1997; Clark et al., 2004) with around 30% reaching adulthood (McNabb et al., 1997), which has suggested that EH plays a relatively minor role in *Drosophila* ecdysis.

The unexpectedly mild and sometimes paradoxical defects of flies lacking EH neurons (e.g., their insensitivity to ETH injections; McNabb et al., 1997; Clark et al., 2004) prompted us to investigate the role of EH using a null allele of the *eh* gene. In line with expectations based on EH's ability to induce ecdysis in other insects, we found that the lack of *eh* function is completely lethal, with most animals dying during the larval stages, at around the time of ecdysis. These animals do not release detectable amounts of ETH; yet, many of their defects could not be rescued by ETH injections, indicating that they are at least in part due to the lack of EH itself. This is the first report that clearly shows that EH has a function in the control of *Drosophila* ecdysis outside of its known role of triggering ETH release (Ewer et al., 1997; Kingan et al., 1997).

Our findings contrast with those reported previously using flies bearing targeted ablations of EH neurons. Although no EH-IR can be detected in cell ablated animals (McNabb et al., 1997), our results with *eh* null alleles suggest that some residual EH function may remain in these animals; this scenario would explain their comparatively mild defects observed at ecdysis, as well as the observation that ETH release occurs on time prior to larval ecdysis (Clark et al., 2004). The lack of increases in cGMP-IR in ETH cells at this time (Clark et al., 2004) suggests that very little EH

function would remain, consistent with it being immunohistochemically undetectable. Another possibility that would explain the differences between the defects expressed by *eh* mutants and those of flies lacking EH neurons is if EH were expressed by other neurons in addition to the ventromedial EH (Vm) neurons targeted by the transgenic constructs used by McNabb et al. (1997). Such expression would have to be comparatively weak, however, since RNA *in situ* and immunohistochemical localization label only the Vm neurons.

Our findings reveal that the functions of ETH and EH are more complex than previously proposed. Indeed, the prevailing view is that the positive endocrine feedback loop between EH and ETH causes the near complete release of ETH and EH (Ewer et al., 1997; Kingan et al., 1997); ETH then turns on pre-ecdysis, and EH released within the CNS causes CCAP and bursicon release, which turns on ecdysis and shuts off pre-ecdysis (Gammie and Truman, 1997a; Ewer and Reynolds, 2002; Lahr et al., 2012). Contrary to expectation, we found that the absence of EH caused larvae to lack the *pre-ecdysis* phase of the ecdysial sequence. Injections of ETH did not rescue this defect, causing only the premature expression of ecdysis behavior. Thus, at least in the larva, ETH is not sufficient to trigger pre-ecdysis; rather this behavioral phase requires EH, either acting alone or in conjunction with ETH. Park et al. (2002) found that *eth* null animals expressed neither pre-ecdysis nor ecdysis, but the status of EH was not examined in these animals; thus, the behavioral defects could be due to a lack of both ETH and EH secretion. Conversely, our findings show that EH is important for the expression of normal ecdysis behavior. Indeed, although the peristaltic waves of ecdysis themselves appeared normal in *eh* mutant larvae, the temporal structure of the behavior was severely altered, and rarely resulted in the shedding of the old cuticle. In addition, the fact that ETH release could not be detected in *eh* null mutant animals indicates that EH is absolutely required for ETH to be released in

*Drosophila*; this contrasts with the situation in *Manduca* where ETH release is initiated by corazonin (Kim et al., 2004). Finally, EH seems to play a role (direct or indirect) in limiting the duration of ecdysis itself since it is greatly extended in the absence of EH.

The pattern of activation induced by ETH in CCAP neurons provides insights into the role of EH vs. that of ETH in the control of ecdysis. The most consistent defect we observed in *eh* null mutant animals was a significant reduction in the level of responsiveness. Especially for CCAP neurons in abdominal segments AN1-4, we found that only a small percentage of neurons responded, and the few neurons that responded did so with greatly reduced amplitude.

The roles of ETH and EH appear to differ in *Drosophila* compared to their proposed roles in other insects. However, *Drosophila* may not be exceptional. Indeed, the exact function of ecdysial peptides may be more plastic than previously thought, and differ both between stages and insect species. For example, the lack of EH eliminates pre-ecdysis in the larva (this report), yet at pupation causes failures at ecdysis and a significant extension in the duration of pre-ecdysis (Mena and Ewer, unpublished). This situation is not unique to EH. Indeed, the lack of *partner of bursicon* gene (*pburs*) function (which encodes one of the subunits of the so-called tanning hormone, bursicon; Luo et al., 2005; Mendive et al., 2005) causes severe defects only at pupal and not larval, ecdysis (Lahr et al., 2012). Yet another change in function occurs at adult ecdysis, where bursicon is not released until after the adult emerges and is able to spread its wings (Peabody et al., 2009); at this stage it is required during post-ecdysis to cause wing expansion and cuticle maturation (Honegger et al., 2008). Such changes also occur across species: although ETH, EH, CCAP, and bursicon appear to be associated with ecdysis in many insects and even crustacea (Phlippen et al., 2000; Webster et al., 2013), their exact role may vary. For instance, CCAP plays a minor role in *Drosophila* ecdysis (Lahr et al., 2012), but it is critical

for *Tribolium ecdysis* (Arakane et al., 2008). These examples and others (White and Ewer, 2014) suggest that the exact function of ecdysial peptides may change during the development of a single species as well as across species. The different responses elicited by this highly conserved signaling system are likely to be mediated through changes in the spatial and temporal pattern of receptor expression, allowing the same neuropeptides to trigger behavioral and physiological sequences that are appropriate for that species and stage.

Plasticity mediated by changes in receptor expression also applies to other neuropeptide controlled behaviors. For example, arginine vasopressin (AVP) causes different affiliative responses in monogamous vs. promiscuous voles (Winslow et al., 1993) due, at least in part to the different distribution of AVP receptors in the brain (Young et al., 1999). This combination of conserved signals acting on developmentally and evolutionarily different receptor landscapes may provide a general mechanism for creating diversity in peptide action, which is a hallmark of these signaling molecules (Strand, 1999).

Although some of the functions of ETH, EH, CCAP, and bursicon in *Drosophila ecdysis* have been clarified, many questions remain. A deeper understanding of the function of these neuropeptides is needed, and will undoubtedly be aided by identifying their neuronal targets and by developing receptor-GAL4 drivers to investigate the role of different neuronal subsets in the control of ecdysis. Furthermore, the widespread utility of the recently described CRISPR/cas9 genome engineering tool (Doudna and Charpentier, 2014) means that an understanding of the control of ecdysis in other insect groups may soon be within reach.

**Table 1.** Sequences of primers used for PCR amplification. Sequences added to include restriction site indicated in lower case

| <b>Name</b> | <b>Use</b>                    | <b>Sequence</b>                |
|-------------|-------------------------------|--------------------------------|
| EH-F1       | Screen for excision of G8594  | AAGGAAGTGATGGAGAAGTTCCG        |
| EH-R1       | Screen for excision of G8594  | GGAAAGAGCTCTGAAGAAATGG         |
| EH-F2       | Screen for <i>eh</i> deletion | CAGAGTAAAGAAGCCCGATACG         |
| EH-R2       | Screen for <i>eh</i> deletion | AGTACCGTTCCTACGTCACTGG         |
| EH-F3       | Cloning of <i>eh</i> cDNA     | CACATCCGTTGGAATCAAAG           |
| EH-R3       | Cloning of <i>eh</i> cDNA     | gcggccgcAGGCCATAAAAGCACACACC   |
| EH-F4       | EH genomic rescue             | CTTTCTGATGCTCGGAATCT           |
| EH-R4       | EH genomic rescue             | CTTAATATTTGTTTATTTAC           |
| EH-F5       | <i>In vitro</i> EH expression | gaattcTTGCCCGCCATAAGTCATTATACG |
| EH-R5       | <i>In vitro</i> EH expression | CGCCTCTTATCGCTTCACTCG          |

## FIGURES

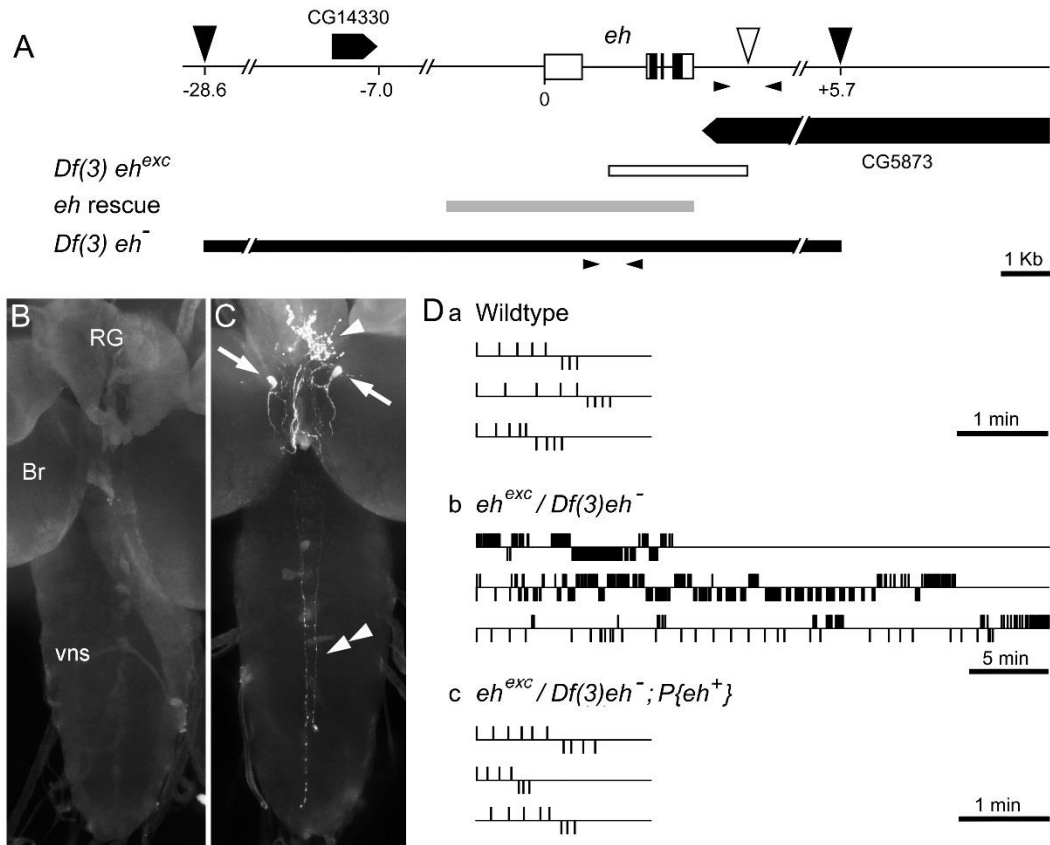

**Figure 1** Basic features of *eh* null allele. (A) Map of *eh* region. Filled and open boxes: coding and non-coding exons of *eh* gene, respectively. Open inverted triangle: G8594 mobile element used to produce *eh* null allele (*Df(3)eh<sup>exc</sup>*); deleted fragment indicated by open bar below map; small horizontal triangles indicate position of primers used for initial screen. Filled inverted triangles: mobile elements used to produce genetic deletion that included *eh* gene (*Df(3)eh<sup>-</sup>*); deleted fragment indicated by filled bar below map; small horizontal triangles indicate position of primers used for initial screen. Gray bar below map indicates extent of genomic fragment used for transgenic rescue. (B, C) EH-immunoreactivity in third instar CNS of *eh* hemizygous



mutant ( $Df(3)eh^{exc}/Df(3)eh^{-}$ ) (B) and of control (C). In (C), arrows point to cell bodies; single arrowhead indicates neurohemal release site in *Corpora Cardiaca* and double arrowhead points to axons in ventral nervous system (vns); other abbreviations in B: Br: brain; RG: ring gland.

(D) Pictorial representation of ecdysis behavior of three: wildtype (a), *eh* hemizygous mutant (b), and transgenic rescue (c) larvae. Each line represents the timecourse of ecdysis behavior, with upwards and downward directed lines representing anteriorly- and posteriorly- directed ecdysial peristalses, respectively. Mutant larvae expressed long runs of anterior- or posterior-directed peristalses, with no clear temporal order and interspersed with quiescent periods of variable duration. These data are summarized in Figure 2A-C. Note that time scale for the record for *eh* hemizygous mutant larvae (Fig. 1, Db) is 1/5<sup>th</sup> that of control and transgenic rescue animals.

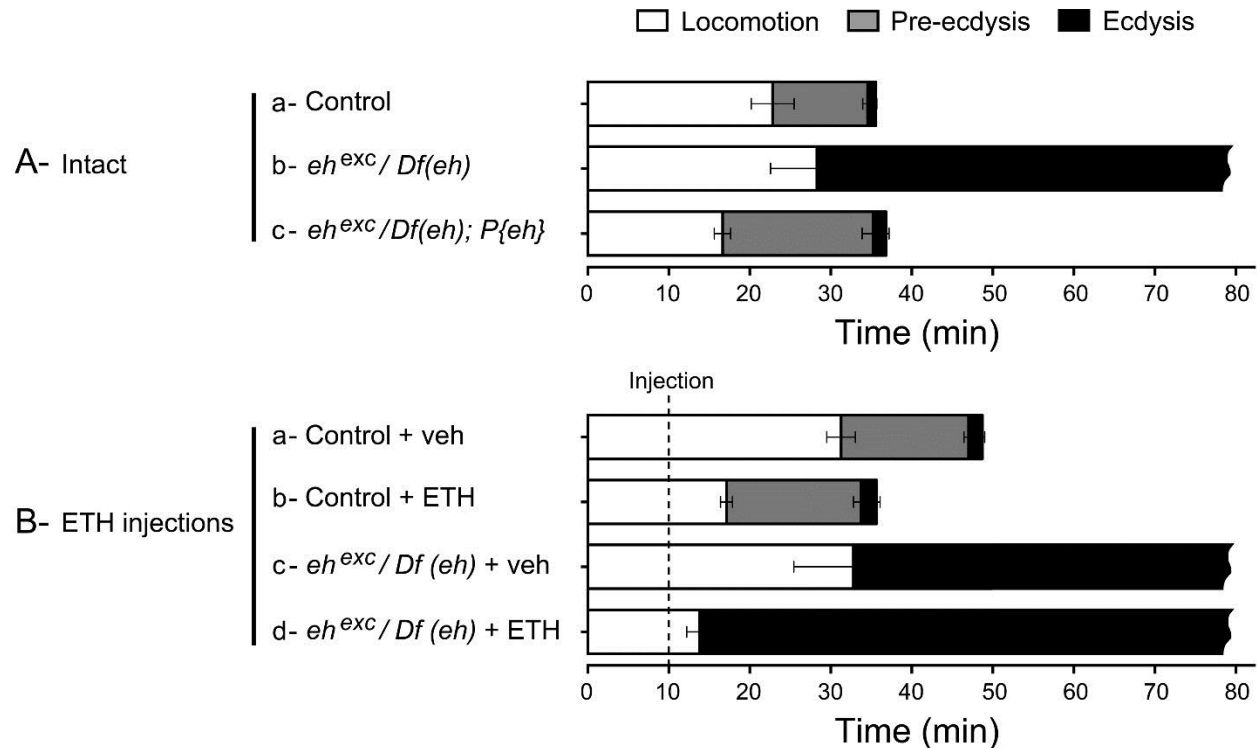

**Figure 2** Summary of larval ecdysis behavior of intact (A) and ETH injected (B) larvae. Each bar represents average ( $\pm$  SEM) duration of locomotion (open bars), pre-ecdysis (gray bars) and ecdysis (black bars). Time zero corresponds to DVP. In (B) injections were done at DVP + 10 min (vertical dashed line); veh: vehicle injection. *eh* hemizygous mutant larvae (Ab) did not express pre-ecdysis; ecdysial phase was variable in duration, usually exceeding 80 min (see text); these defects were rescued by a transgene containing *eh* gene (Ac). Note that ETH injections accelerated onset of ecdysis of *eh* hemizygous mutant larvae (compare Bd vs. Bc;  $p < 0.01$ ), yet did not restore a pre-ecdysial phase. Bar associated with ecdysis phase for hemizygous *eh* null mutant animals has been truncated at 80 min. N=8-11 animals per group.

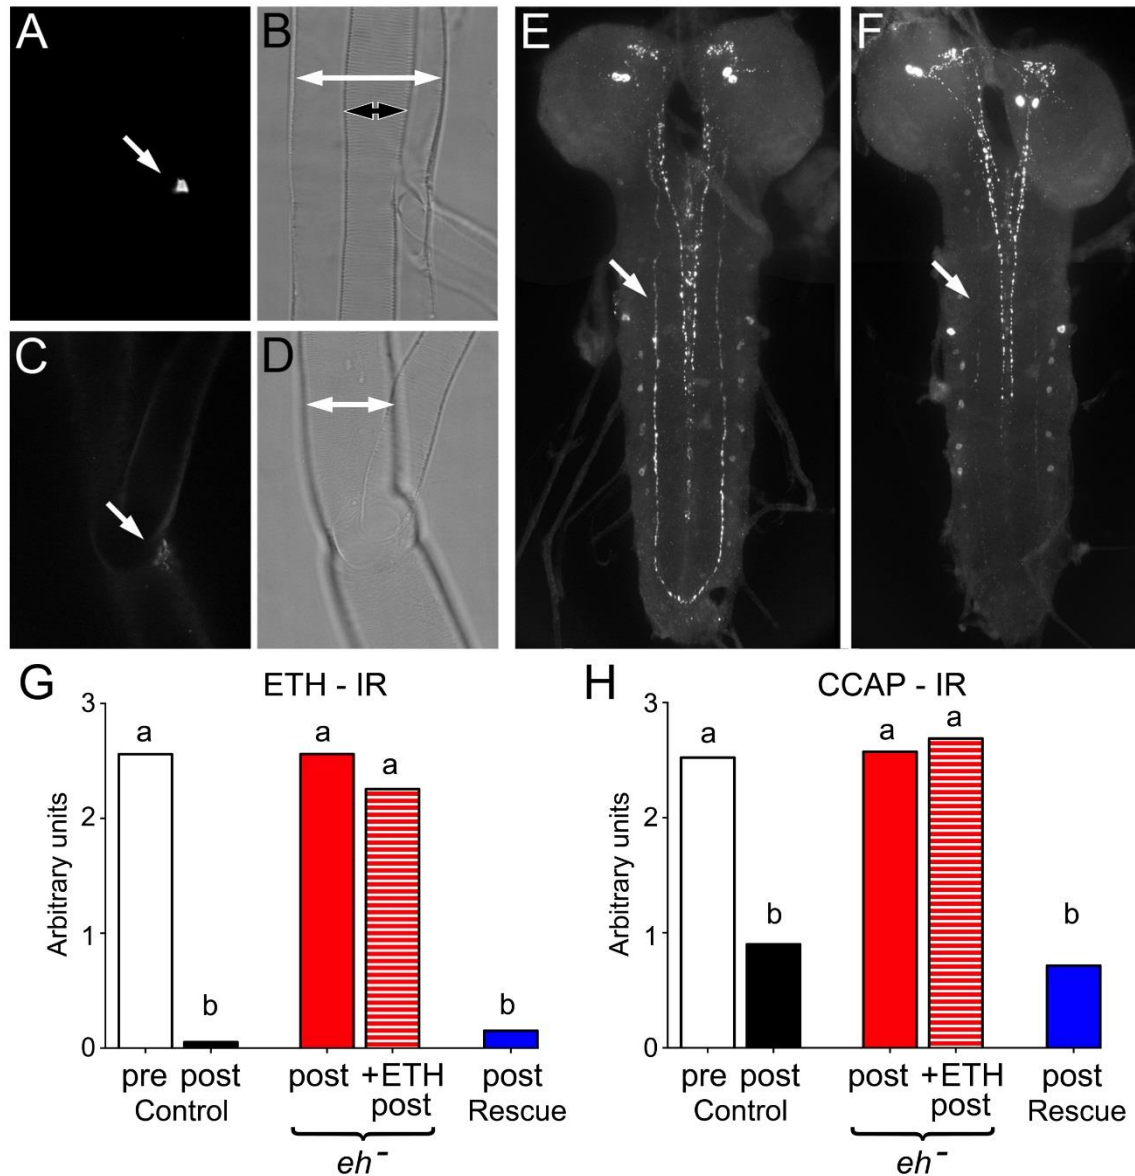

**Figure 3** Status of ETH and CCAP in the absence of EH. (A, C) ETH-IR in ETH cells (arrow) of wildtype larvae before (A) and after (C) ecdysis. Note dramatic loss of immunoreactivity in ETH cells at ecdysis (C vs. A). (B, D) Corresponding light field images of trachea. White double arrow shows the extent of the trachea of third instar, whereas black double arrow (in B) shows that of lining of second instar trachea, which is shed at ecdysis. (E, F) CCAP-IR in CNS

of wildtype larvae before (E), and after (F), ecdysis. The most prominent change following ecdysis is the loss of immunoreactivity of lateral axon (arrow; compare F vs. E). (G, H) Quantification of ETHR-IR (G) and CCAP-IR (H) in control larvae before (pre) and after (post) ecdysis, in *eh* hemizygous mutant larvae (*eh*<sup>-</sup>) after expression of ecdysis behaviors in intact animals (post) or following ETH injections (+ETH post). N=8-11 animals per group. “Rescue, post” shows immunoreactivity after ecdysis of *eh* hemizygous mutant larvae carrying wildtype *eh* transgene. Outcome of Kruskal-Wallis comparisons is indicated, with different letters marking statistically significant differences ( $p < 0.05$ ).

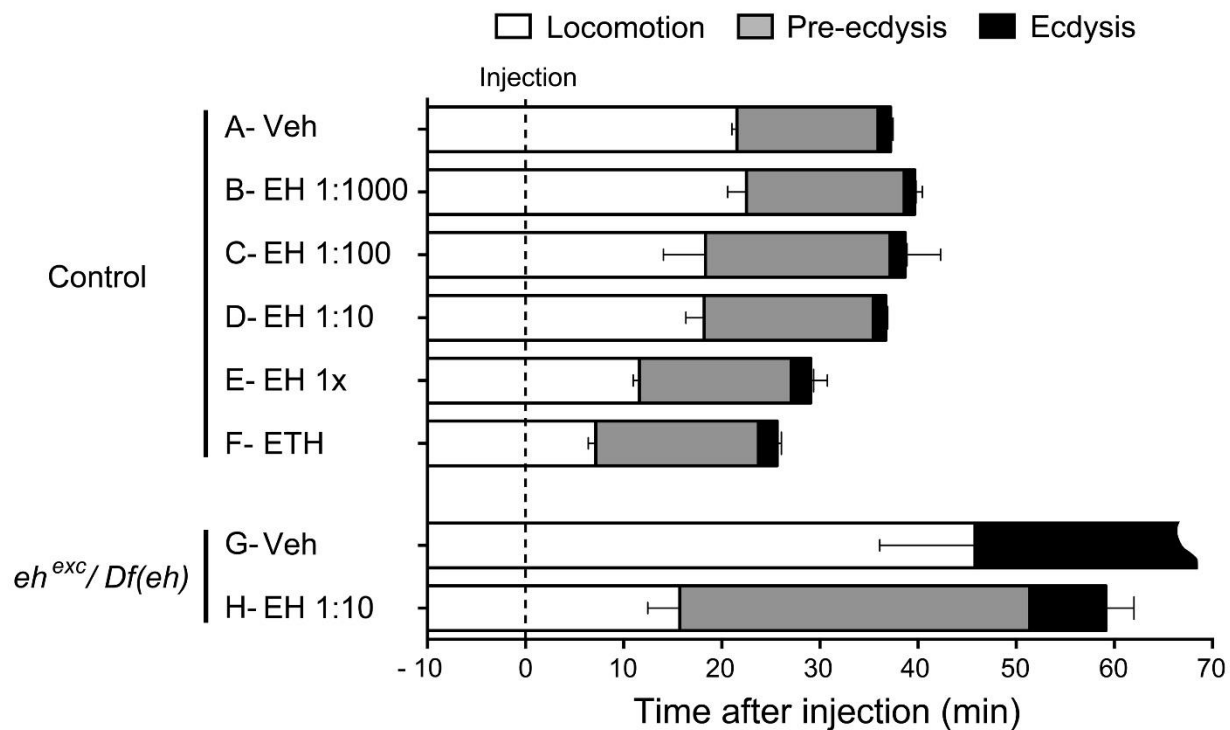

**Figure 4** Injections of synthetic EH can partially rescue pre-ecdysial defects of *eh* hemizygous mutant larvae. (A-F) Timing of ecdysis behaviors in wildtype larvae injected with vehicle (A), increasing amounts of synthetic EH (B-E), and ETH (F). (G, H) Timing of ecdysis behaviors in *eh* hemizygous mutant larvae injected with vehicle (G) and synthetic EH (H). Injections of EH caused the expression of a pre-ecdysis phase within ecdysial sequence. Phases of behavior indicated as described in Fig. 2; injections were done 10 min after DVP (vertical dashed line). Note that in all cases, injections of vehicle alone caused a delay in the onset of ecdysial behaviors (compare Fig. 4 vs. Fig. 2). N= 9-11 animals per group, except B-D (for which N= 4-5).

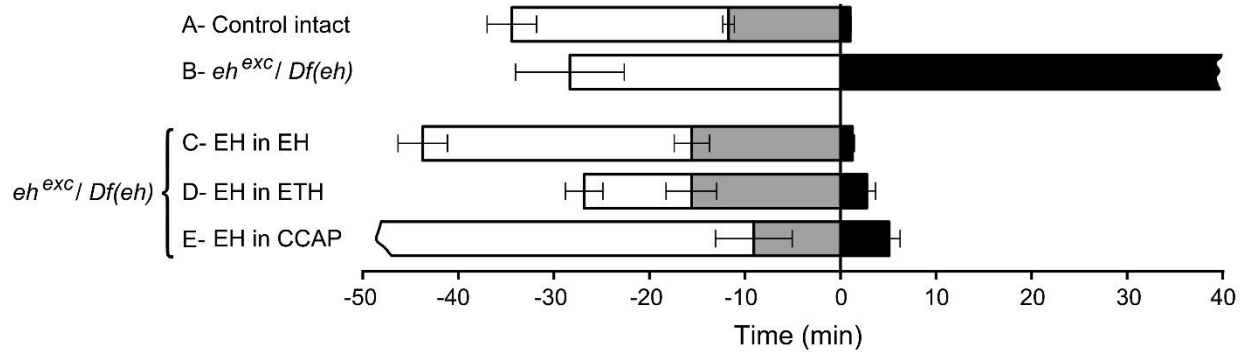

**Figure 5** Rescue of behavior by ectopic expression of EH. Timing of ecdysis behaviors in control larvae (A), in *eh* hemizygous mutant larvae (B), and in *eh* hemizygous mutant larvae expressing EH: in EH neurons (C); in ETH cells (D); and in CCAP neurons (E). Phases of behavior indicated as described in Fig. 2, but because expressing EH in CCAP neurons caused ecdysis to occur prior to the DVP stage, the records have been aligned relative to the time of onset of ecdysis behavior. The time of the “Locomotion” phase started at DVP, except for (E), where animals expressed ecdysial behaviors before pigmentation of vertical plates was apparent; the lack of a DVP stage for this genotype is indicated by the jagged vertical line for the onset of the “Locomotion” period. Bar associated with ecdysis phase in hemizygous *eh* null mutant animals (B) was truncated at 40 min. N=9-13 animals per group.

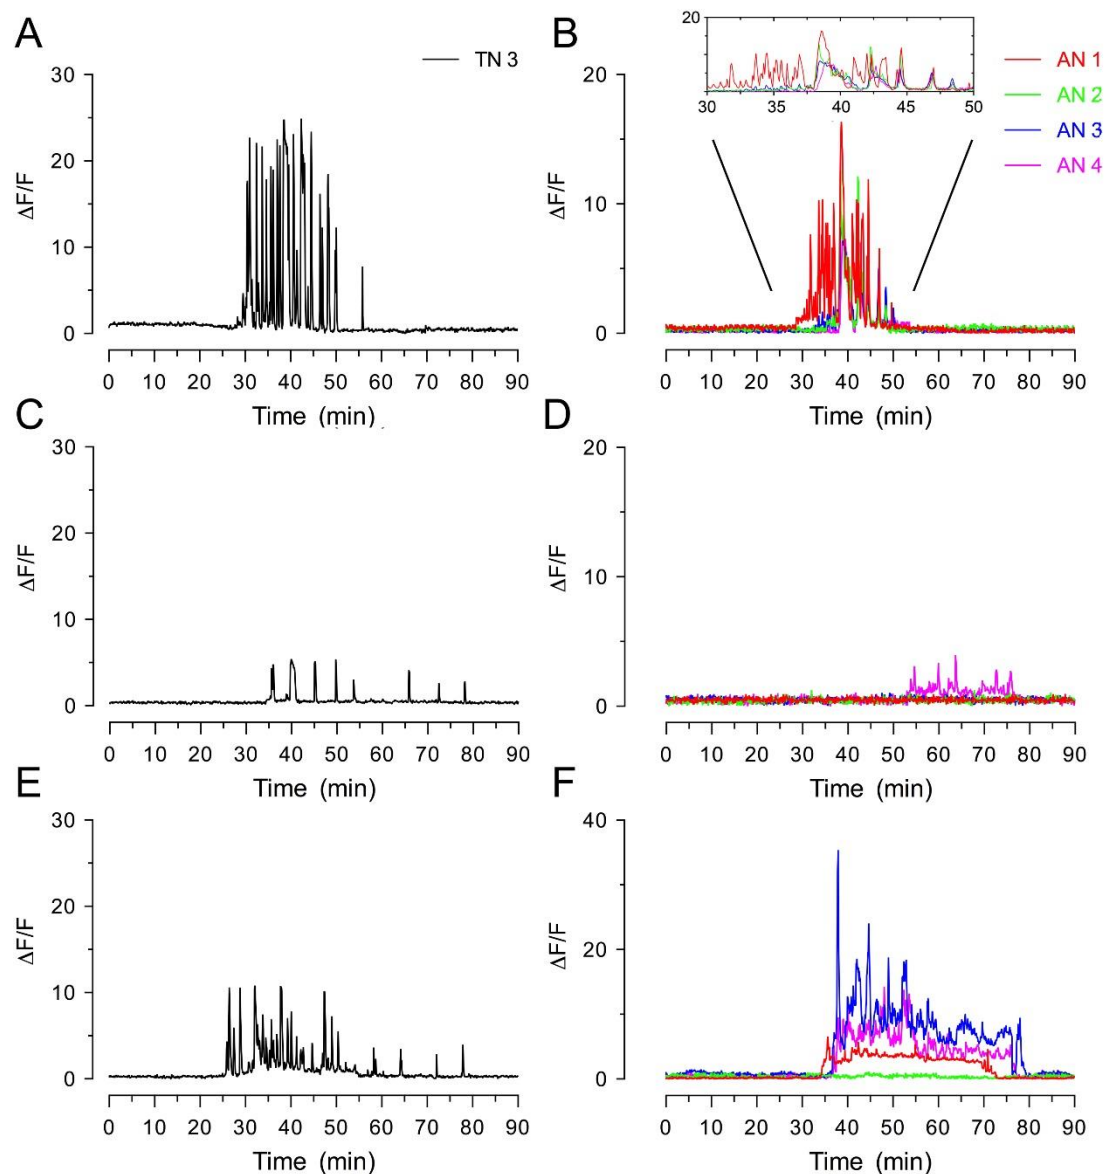

**Figure 6** Pattern of activation of CCAP neurons by ETH in the absence of EH. Representative records of activity of CCAP TN3 (A, C, E) and AN1-4 neurons (B, D, F; each colored line corresponds to the record of a single neuron from each of these neuromeres) from a single preparation induced *ex vivo* by ETH in CNS of wildtype (A, B) (inset above B: expanded trace of region of record indicated by oblique lines), and in a *eh* hemizygous (C, D) animal, and in *eh* hemizygous larvae bearing wildtype *eh* transgene (E, F). Note that scale in F is  $\frac{1}{2}$  that of B and D. See Fig. 7 for a summary of these data.

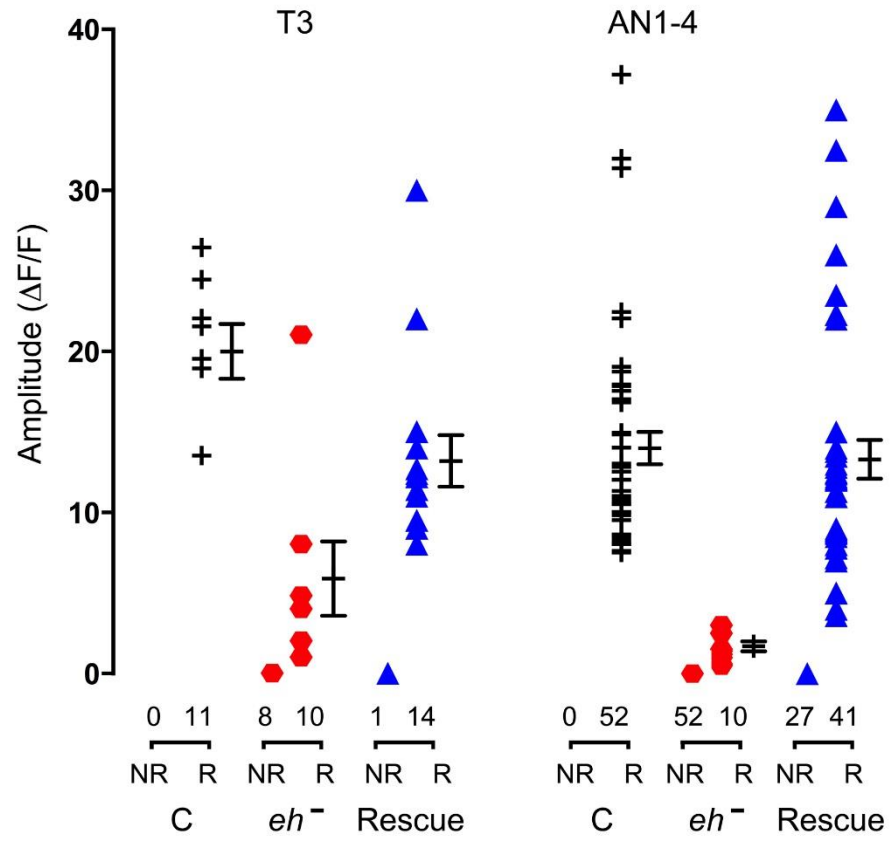

**Figure 7** Summary response of CCAP neurons to ETH in the absence of EH. Each point indicates maximum amplitude of response of CCAP neurons in TN3 and AN1-4 induced *ex vivo* by ETH in Control (C; black crosses), *eh* hemizygous larvae (*eh*<sup>-/-</sup>; red polygons), and *eh* hemizygous larvae bearing wildtype *eh* transgene (Rescue; blue triangles); bar next to symbols indicates average  $\pm$  SEM. NR and R: number of non-responsive and responsive neurons, respectively, out of 7 preparations examined for each genotype. Only neurons that were clearly in focus were included in tally (ca. 80% of total). The absence of EH caused, respectively, 44% (8 out of 10) and 84% (52 out of 62) TN3 and AN1-4 neurons to be unresponsive; it also significantly reduced the amplitude of the response of the neurons that did respond. Both defects were substantially rescued by a single copy of the wildtype *eh* gene (Rescue).



## REFERENCES

- Arakane, Y., Li, B., Muthukrishnan, S., Beeman, R. W., Kramer, K. J. and Park, Y. (2008) Functional analysis of four neuropeptides, EH, ETH, CCAP and bursicon, and their receptors in adult ecdysis behavior of the red flour beetle, *Tribolium castaneum*, *Mech Dev* 125(11-12): 984-95.
- Baker, J. D., McNabb, S. L. and Truman, J. W. (1999) The hormonal coordination of behavior and physiology at adult ecdysis in *Drosophila melanogaster*, *J. Exp. Biol.* 202(Pt 21): 3037-3048.
- Clark, A. C., Del Campo, M. and Ewer, J. (2004) Neuroendocrine control of larval ecdysis behavior in *Drosophila*: complex regulation by partially redundant neuropeptides, *J. Neuroscience* 24: 4283-4292.
- Copenhaver, P. F. and Truman, J. W. (1982) The role of eclosion hormone in the larval ecdyses of *Manduca sexta*, *J. Insect Physiol.* 28(8): 695-701.
- Diao, F., H, I., Luan, H., Diao, F., Shropshire, W., Ewer, J., Marr, E., Potter, C., Landgraf, M. and White, B. (2015) Plug-and-Play Genetic Access to *Drosophila* Cell Types Using Exchangeable Exon Cassettes. *Cell Reports*, *Cell Reports* In press.
- Doudna, J. A. and Charpentier, E. (2014) Genome editing. The new frontier of genome engineering with CRISPR-Cas9, *Science*. 346(6213): 1258096.
- Ewer, J., Gammie, S. C. and Truman, J. W. (1997) Control of insect ecdysis by a positive-feedback endocrine system: roles of eclosion hormone and ecdysis triggering hormone, *J. Exp. Biol.* 200: 869-881.
- Ewer, J. and Reynolds, S. (2002) Neuropeptide control of molting in insects. in D. W. Pfaff A. P. Arnold S. E. Fahrbach A. M. Etgen and R. T. Rubin (eds.) *Hormones, brain and behavior*,

vol. 35. San Diego, CA: Academic Press.

Fugo, H. and Iwata, Y. (1983) The presence of eclosion hormone activity in the crude brain hormone and *Bombyx* eclosion hormone assay, *J. Seric. Sci. Tokyo* 51: 523-527.

Gammie, S. C. and Truman, J. W. (1997a) Neuropeptide hierarchies and the activation of sequential motor behaviors in the hawkmoth, *Manduca sexta*, *J. Neurosci.* 17: 4389-4397.

Gammie, S. C. and J. W. Truman (1997b). An endogenous elevation of cGMP increases the excitability of identified insect neurosecretory cells. *J. Comp. Physiol. A* 180: 329-337.

Gammie, S. C. and Truman, J. W. (1999) Eclosion hormone provides a link between ecdysis-triggering hormone and crustacean cardioactive peptide in the neuroendocrine cascade that controls ecdysis behavior, *J. Exp. Biol.* 202: 343-352.

Gloor, G. B., Preston, C. R., Johnson-Schlitz, D. M., Nassif, N. A., Phillis, R. W., Benz, W. K., Robertson, H. M. and Engels, W. R. (1993) Type I repressors of P element mobility, *Genetics* 135(1): 81-95.

Honegger, H. W., Dewey, E. M. and Ewer, J. (2008) Bursicon, the tanning hormone of insects: recent advances following the discovery of its molecular identity, *J Comp Physiol A* 194(12): 989-1005.

Kim, Y. J., Spalovska-Valachova, I., Cho, K. H., Zitnanova, I., Park, Y., Adams, M. E. and Zitnan, D. (2004) Corazonin receptor signaling in ecdysis initiation, *Proc Natl Acad Sci U S A* 101(17): 6704-9.

Kim, Y. J., Zitnan, D., Galizia, C. G., Cho, K. H. and Adams, M. E. (2006a) A command chemical triggers an innate behavior by sequential activation of multiple peptidergic ensembles, *Curr Biol.* 16(14): 1395-407.

- Kim, Y. J., D. Zitnan, K. H. Cho, D. A. Schooley, A. Mizoguchi and M. E. Adams (2006b) Central peptidergic ensembles associated with organization of innate behavior. *Proc. Natl. Acad. Sci. U.S.A.* 103: 14211-14216.
- Kingan, T. G., Gray, W., Zitnan, D. and Adams, M. E. (1997) Regulation of ecdysis-triggering hormone release by eclosion hormone, *J. Exp. Biol.* 200: 3245-3256.
- Lahr, E., Dean, D. and Ewer, J. (2012) Genetic analysis of ecdysis behavior in *Drosophila* reveals partially overlapping functions of two unrelated neuropeptides, *J. Neurosci.* 32(20): 6819-6829.
- Luo, C.-W., Dewey, E. M., Sudo, S., Ewer, J., Hsu, S. Y., Honegger, H.-W. and Hsueh, A. J. W. (2005) Bursicon, the insect cuticle hardening hormone, is a heterodimeric cystine knot protein that activates G protein-coupled receptor LGR2, *Proc. Natl. Acad. Sci. USA* 102: 2820-2825.
- McNabb, S. L., Baker, J. D., Agapite, J., Steller, H., Riddiford, L. M. and Truman, J. W. (1997) Disruption of behavioral sequence by targeted death of peptidergic neurons in *Drosophila*, *Neuron* 19: 813-823.
- Mendive, F. M., Van Loy, T., Claeysen, S., Poels, J., Williamson, M., Hauser, F., Grimmelikhuijzen, C. J., Vassart, G. and Vanden Broeck, J. (2005) *Drosophila* molting neurohormone bursicon is a heterodimer and the natural agonist of the orphan receptor *DLGR2*, *FEBS Lett* 579(10): 2171-6.
- Nagasawa, H., Fugo, H., Takahashi, S., Kamito, T., Isogai, A. and Suzuki, A. (1983) Purification and properties of eclosion hormone of the silkworm, *Bombyx mori*, *Agric. Biol. Chem.* 47(8): 1901-1906.
- Park, J. H., Schroeder, A. J., Helfrich-Förster, C., Jackson, F. R. and Ewer, J. (2003) Targeted ablation of CCAP neuropeptide-containing neurons of *Drosophila* causes specific defects in

execution and circadian timing of ecdysis behavior, *Development* 130: 2645-2656.

Park, Y., Filippov, V., Gill, S. S. and Adams, M. E. (2002) Deletion of the ecdysis-triggering hormone gene leads to a lethal ecdysis deficiency, *Development* 129: 493-503.

Parks, A. L., Cook, K. R., Belvin, M., Dompe, N. A., Fawcett, R., Huppert, K., Tan, L. R., Winter, C. G., Bogart, K. P., Deal, J. E. et al. (2004) Systematic generation of high-resolution deletion coverage of the *Drosophila melanogaster* genome, *Nat Genet* 36(3): 288-92.

Peabody, N. C., Pohl, J. B., Diao, F., Vreede, A. P., Sandstrom, D. J., Wang, H., Zelensky, P. K. and White, B. H. (2009) Characterization of the decision network for wing expansion in *Drosophila* using targeted expression of the TRPM8 channel, *J Neurosci* 29(11): 3343-53.

Philippen, M. K., Webster, S. G., Chung, J. S. and Dircksen, H. (2000) Ecdysis of decapod crustaceans is associated with a dramatic release of crustacean cardioactive peptide into the haemolymph, *J Exp Biol* 203: 521-36.

Robertson, H. M., Preston, C. R., Phillis, R. W., Johnson-Schlitz, D. M., Benz, W. K. and Engels, W. R. (1988) A stable genomic source of *P* element transposase in *Drosophila melanogaster*, *Genetics* 118(3): 461-70.

Strand, F. L. (1999) *Neuropeptides: Regulators of physiological processes*: MIT Press.

Terzi, G., Truman, J. W. and Reynolds, S. E. (1988) Purification and characterization of eclosion hormone from the moth, *Manduca sexta*, *Insect Biochem.* 18(7): 701-707.

Tian, L., Hires, S. A., Mao, T., Huber, D., Chiappe, M. E., Chalasani, S. H., Petreanu, L., Akerboom, J., McKinney, S. A., Schreiter, E. R. et al. (2009) Imaging neural activity in worms, flies and mice with improved GCaMP calcium indicators, *Nat Methods.* 6(12): 875-81. doi: 10.1038/nmeth.1398. Epub 2009 Nov 8.

Truman, J. W. and Riddiford, L. M. (1970) Neuroendocrine control of ecdysis in silkworms,

*Science* 167: 1624-1626.

Truman, J. W., Taghert, P. H. and Reynolds, S. E. (1980) Physiology of pupal ecdysis in the tobacco hornworm, *Manduca sexta*: I Evidence for control by eclosion hormone, *J. exp. Biol.* 88: 327-337.

van Roessel, P. and Brand, A. H. (2000) GAL4-mediated ectopic gene expression in *Drosophila*. in W. Sullivan M. Ashburner and R. S. Hawley (eds.) *Drosophila protocols*. New York: Cold Spring Harbor Laboratory Press.

Venken, K. J., He, Y., Hoskins, R. A. and Bellen, H. J. (2006) P[acman]: a BAC transgenic platform for targeted insertion of large DNA fragments in *D. melanogaster*, *Science* 314(5806): 1747-51.

Webster, S. G., Wilcockson, D. C., Mrinalini and Sharp, J. H. (2013) Bursicon and neuropeptide cascades during the ecdysis program of the shore crab, *Carcinus maenas*, *Gen Comp Endocrinol.* 182:54-64.(doi): 10.1016/j.ygcen.2012.11.018. Epub 2012 Dec 14.

White, B. H. and Ewer, J. (2014) Neural and hormonal control of postecdysial behaviors in insects, *Annu Rev Entomol.* 59:363-81.(doi): 10.1146/annurev-ento-011613-162028. Epub 2013 Oct 23.

Wieschaus, E. and Nüsslein-Volhard, C. (1998) Looking at embryos. in D. B. Roberts (ed.) *Drosophila: A practical approach*, vol. Ch. 6.

Winslow, J. T., Hastings, N., Carter, C. S., Harbaugh, C. R. and Insel, T. R. (1993) A role for central vasopressin in pair bonding in monogamous prairie voles, *Nature.* 365(6446): 545-8.

Young, L. J., Nilsen, R., Waymire, K. G., MacGregor, G. R. and Insel, T. R. (1999) Increased affiliative response to vasopressin in mice expressing the V1a receptor from a monogamous vole, *Nature* 400(6746): 766-8.

Zitnan, D. and Adams, M. E. (2000) Excitatory and inhibitory roles of central ganglia in

initiation of the insect ecdysis behavioural sequence, *J Exp Biol* 203: 1329-40.

Zitnan, D. and Adams, M. E. (2012) Neuroendocrine regulation of ecdysis. in L. I. Gilbert (ed.)

*Insect Endocrinology*: Elsevier.

Zitnan, D., Kingan, T. G., Hermesman, J. L. and Adams, M. E. (1996) Identification of ecdysis-

triggering hormone from epitracheal endocrine system, *Science* 271: 88-91.
